# Supplementary material for: Simvastatin Sodium Salt and Fluvastatin Interact with Human Gap Junction Gamma-3 Protein
Source: PubMed Central journal article supplement (PMC4749215; doi:10.1371/journal.pone.0148266), 2016-02-10
Supplement: pone.0148266.s011.pdf [file pone.0148266.s011.pdf]

1  
Consensus M c w r t L q r i L  
Conservation  
gil31559821|reflINP\_853516.1|MCGRFLRRL  
gil42558283|reflINP\_003995.2|MDWGT LQTIL

11  
a e e s k h S T p i  
A E E S R R S T P V  
G G V N K H S T S I

21  
G k i l l p V L l i  
G R L L L P V L L G  
G K I W L T V L F I

31  
Consensus F R i m i L a a a a  
Conservation  
gil31559821|reflINP\_853516.1|FR L V L L A A S G  
gil42558283|reflINP\_003995.2|FR I M I L V V A A

41  
p e V y G D E Q a e  
P G V Y G D E Q S E  
K E V W G D E Q A D

51  
F V C h T q Q P G C  
F V C H T Q Q P G C  
F V C N T L Q P G C

61  
Consensus K a a C y D a y h P  
Conservation  
gil31559821|reflINP\_853516.1|K A A C F D A F H P  
gil42558283|reflINP\_003995.2|K N V C Y D H Y F P

71  
i S p i R l W a l Q  
L S P L R F W V F Q  
I S H I R L W A L Q

81  
l i l V a t P a a L  
V I L V A V P S A L  
L I F V S T P A L L

91  
Consensus y a m h t a Y h r -  
Conservation  
gil31559821|reflINP\_853516.1|Y M G F T L Y H V -  
gil42558283|reflINP\_003995.2|V A M H V A Y R R H

101  
- i k h k e i s G k  
- I W H W E L S G K  
E K K R K F I K G E

111  
i K s E e k l i q e  
G K E E T L I Q G  
I K S E F K D I E E

121  
Consensus i k - t q k V p i a  
Conservation  
gil31559821|reflINP\_853516.1|IR E G N T D V P G A  
gil42558283|reflINP\_003995.2|I K - T Q K V R I E

131  
G S - - L l W a Y t  
G S L R L L W A Y V  
G S - - L W W T Y T

141  
a q i g a R l i l e  
A Q L G A R L V L E  
S S I F F R V I F E

151  
Consensus a A a m y l q Y h m  
Conservation  
gil31559821|reflINP\_853516.1|G A A L G L Q Y H L  
gil42558283|reflINP\_003995.2|A A F M Y V F Y V M

161  
Y - G F q M q s s v  
Y - G F Q M P S S F  
Y D G F S M Q R L V

171  
a C r a e P C p g s  
A C R R E P C L G S  
K C N A W P C P N T

181  
Consensus i t C f l S R P s E  
Conservation  
gil31559821|reflINP\_853516.1|I T C N L S R P S E  
gil42558283|reflINP\_003995.2|V D C F V S R P T E

191  
K T i F l k t M i a  
K T I F L K T M F G  
K T V F T V F M I A

201  
V S G i C i l l t v  
V S G F C L L F T F  
V S G I C I L L N V

211  
Consensus l E L c y L l i - R  
Conservation  
gil31559821|reflINP\_853516.1|L E L V L L G L G R  
gil42558283|reflINP\_003995.2|T E L C Y L L I - R

221  
y - - - - -  
W W R T W K H K S S  
Y - - - - -

231  
- - - - -  
S S K Y F L T S E S  
- - - - -

241  
Consensus - - - - -  
Conservation  
gil31559821|reflINP\_853516.1|T R R H K K A T D S  
gil42558283|reflINP\_003995.2| - - - - -

251  
- - - - -  
L P V V E T K E Q F  
- - - - -

261  
- - - - - c a  
Q E A V P G R S L A  
- - - - - C S

271  
Consensus q k k q k - - - -  
Conservation  
gil31559821|reflINP\_853516.1|Q E K Q R P V G P R  
gil42558283|reflINP\_003995.2|G K S K K - - - -

281  
p a  
D A  
P V
