# Supplementary material for: Simvastatin Sodium Salt and Fluvastatin Interact with Human Gap Junction Gamma-3 Protein
Source: PubMed Central journal article supplement (PMC4749215; doi:10.1371/journal.pone.0148266), 2016-02-10
Supplement: pone.0148266.s012.pdf [file pone.0148266.s012.pdf]

Display Settings:  Multiple Alignment

HomoloGene:15399. Gene conserved in Boreoeutheria

[Download](#) , [Links](#)

### Multiple Sequence Alignment

Generated by MUSCLE [\[see reference\]](#) version 3.6 (using option: -maxiters 2).

|                                |   |                                                    |    |
|--------------------------------|---|----------------------------------------------------|----|
| <a href="#">NP_853516.1</a>    | 1 | -----MCGRFLRLLAEESRRSTPVGRLLLPVLLGFRLVLLAA         | 38 |
| <a href="#">XP_001143440.2</a> | 1 | -----MCGRFLRLLAEESRRSTPVGRLLLPVLLGFRLVLLAA         | 38 |
| <a href="#">XP_002803266.1</a> |   | -----                                              |    |
| <a href="#">XP_005621129.1</a> | 1 | -----MCGSFLRQLLAEDSRHSTAVGHLLLPVLLGFRLVLLAA        | 38 |
| <a href="#">NP_001076962.1</a> | 1 | -----MCGSFLRRVAAEESRHPTPVGRLLLPALLGLRLVLLAA        | 38 |
| <a href="#">NP_536698.2</a>    | 1 | -MLLLELPIKRCMCGRFLRQLLAQESQHSTPVGFRLLPMLMGFRLLILVS | 49 |
| <a href="#">XP_006249079.1</a> | 1 | MDCFLEL-----MCCSFLRQLLAQESQHSTPVGFRLLPVLVGFRLILVS  | 45 |

|                                |    |                                                    |    |
|--------------------------------|----|----------------------------------------------------|----|
| <a href="#">NP_853516.1</a>    | 39 | SGPGVY--GDEQSEFVCHTQQPGCKAACFDAFHPLSPLRFWVFQVILVAV | 86 |
| <a href="#">XP_001143440.2</a> | 39 | SGPGVY--GDEQSEFVCHTQQPGCKAACFDAFHPLSPLRFWVFQVILVAV | 86 |
| <a href="#">XP_002803266.1</a> | 1  | -----HTQQPGCKAACFDAFHPLSPLRFWVFQVILVAV             | 33 |
| <a href="#">XP_005621129.1</a> | 39 | SGTGIY--GDEQSEFVCHTQQAGCKAACFDAFHPLSPLRFWAFQVILVAV | 86 |
| <a href="#">NP_001076962.1</a> | 39 | GGTGVFGGEEQSEFVCHTQQAGCKAVCYDAFHPLSPLRFWAFQVTLVAV  | 88 |
| <a href="#">NP_536698.2</a>    | 50 | SGPGVF--GNDENEFICHLGQPGCKTICYDVFRPLSPLRFWAFQVILMAV | 97 |
| <a href="#">XP_006249079.1</a> | 46 | SGPGVF--GNDENEFMCHLGQPGCKTICYDVFRPLSPLRFWAFQVILMAV | 93 |

|                                |    |                                                    |     |
|--------------------------------|----|----------------------------------------------------|-----|
| <a href="#">NP_853516.1</a>    | 87 | PSALYMGFTLYHVIWHWELSGK-GKEEETLIQGREGNTDVPGAGSLRLLW | 135 |
| <a href="#">XP_001143440.2</a> | 87 | PSALYMGFTLYQVIWHWELSGK-GKEEETLIQGREGNTDVPGAGSLRLLW | 135 |
| <a href="#">XP_002803266.1</a> | 34 | PSALYMGFTLYHVIWHWELSGK-GKEEETLIQGREGNTDVPGAGSLRLLW | 82  |
| <a href="#">XP_005621129.1</a> | 87 | PSTLYMGLILYHVIWRWEESGK-VK-EETLIHQEKSRDASGAGSPRLLW  | 134 |
| <a href="#">NP_001076962.1</a> | 89 | PSALYMGFILYHVIWHWEASEK-VKTEEETLSQGEKGGEASRAGSSRLLW | 137 |
| <a href="#">NP_536698.2</a>    | 98 | PSAIYVAFTLYHVIGYWEVPGKENKEQETQISKGDHSDVSGAKSLKLLW  | 147 |
| <a href="#">XP_006249079.1</a> | 94 | PSAIYVAFTLYHVIGYWEVPGR-NKEQEAQICKGGRCKDVSGAMSLKLLW | 142 |

|                                |     |                                                    |     |
|--------------------------------|-----|----------------------------------------------------|-----|
| <a href="#">NP_853516.1</a>    | 136 | AYVAQLGARLVLEGAALGLQYHLYGFQMPSSFACRREPCLGSITCNLSRP | 185 |
| <a href="#">XP_001143440.2</a> | 136 | AYVAQLGARLVLEGAALGLQYHLYGFQMPSSFACRREPCLGSITCNLSRP | 185 |
| <a href="#">XP_002803266.1</a> | 83  | AYVAQLGARLVLEGTALGLQYHLYGFQMPSSFACRREPCLGSITCHLSRP | 132 |
| <a href="#">XP_005621129.1</a> | 135 | AYVAQLGVRLVLEGAALGLQYHLYGFKIPSSFACRREPCLGSITCYLSRP | 184 |
| <a href="#">NP_001076962.1</a> | 138 | AYVAQLGVRLALEGAALGGQYHLYGFRMPSSFVCRLEPCLGSTNCYLSRP | 187 |
| <a href="#">NP_536698.2</a>    | 148 | AYVAHLGVRLALEGAALGVQYNLYGFKMSSTFICREDPCIGSTTCFQSHP | 197 |
| <a href="#">XP_006249079.1</a> | 143 | AYVAHLGVRLVLEGAALGVQYHLYGFKMPSTFICREDPCIGSTTCFQSHP | 192 |

|                                |     |                                                     |     |
|--------------------------------|-----|-----------------------------------------------------|-----|
| <a href="#">NP_853516.1</a>    | 186 | SEKTIFLKTMTFGVSGFCLLFTFLELVLLGLGRWWRTWKHKSSSSKYFLTS | 235 |
| <a href="#">XP_001143440.2</a> | 186 | SEKTIFLKTMTFGVSGFCLLFTFLELVLLGLGRWWRTWKHKSSSSKYFPTS | 235 |
| <a href="#">XP_002803266.1</a> | 133 | SEKTIFLKTMTFGVSGFCLLFTFLELVLLGLGRWWRTWKHKPSSSKYFPTS | 182 |
| <a href="#">XP_005621129.1</a> | 185 | FEKTIFLKTMTFGVSGCLLFTLVELLVLLGLGKWWRTWKHK-SPSNYSSTS | 233 |
| <a href="#">NP_001076962.1</a> | 188 | SEKSIFLKTMTFGVTGLCLLFTLLELVLLGLGRWWRIWRHKSPSNYSPTS  | 237 |
| <a href="#">NP_536698.2</a>    | 198 | SEKTIFLNIMFGISGACFLFIFLELALLGLGRFWRIYKHKLSFLKKLPTS  | 247 |
| <a href="#">XP_006249079.1</a> | 193 | SEKTILLNTMFGISGACLLFIFLELVLLGLGRVWKTYRHKLPFLKLNSTS  | 242 |

|                                |     |                                              |     |
|--------------------------------|-----|----------------------------------------------|-----|
| <a href="#">NP_853516.1</a>    | 236 | ESTRRHKKATDSLPPVETKEQFQEAVPGRSLAQEKQRPVGPRDA | 279 |
| <a href="#">XP_001143440.2</a> | 236 | ESTRRHKKATDSLPPVETKEQFQEAVPGRSLAQEKQRPVGPRDA | 279 |
| <a href="#">XP_002803266.1</a> | 183 | ESTRRHKEATDSLPPVETKEQFQEAVPGRSSAQEKQRPVGPRDA | 226 |
| <a href="#">XP_005621129.1</a> | 234 | ESTKKHKDPTDNFPVEAKEQFQEA-----EL              | 260 |
| <a href="#">NP_001076962.1</a> | 238 | QSAKRCKAPTDNFPVEIRERPGEAGERGSEVPLSARP-----   | 275 |
| <a href="#">NP_536698.2</a>    | 248 | ESSVRSKDTTDELSVVEAKEPF-----                  | 269 |
| <a href="#">XP_006249079.1</a> | 243 | ERSVRHKDTTDDLSVVETKEPF-----                  | 264 |

| Protein Acc.                   | Gene         | Organism      |
|--------------------------------|--------------|---------------|
| <a href="#">NP_853516.1</a>    | GJC3         | H.sapiens     |
| <a href="#">XP_001143440.2</a> | GJC3         | P.troglodytes |
| <a href="#">XP_002803266.1</a> | LOC100424576 | M.mulatta     |
| <a href="#">XP_005621129.1</a> | GJC3         | C.lupus       |

|                |      |              |
|----------------|------|--------------|
| NP_001076962.1 | GJC3 | B.taurus     |
| NP_536698.2    | Gjc3 | M.musculus   |
| XP_006249079.1 | Gjc3 | R.norvegicus |
